# Supplementary material
Source: publisher figshare collection journal article supplement (https://karger.figshare.com/articles/dataset/_/5241919)
Supplement: Supplementary file 2 [file 1]

In the article by Slack et al., entitled 'Pharmacological characterization of the  $\alpha\beta 6$  integrin binding and internalization kinetics of the foot-and-mouth disease virus derived peptide A20FMDV2' [Pharmacology 2016;97:114–125, DOI: 10.1159/000443180], there are errors in table 1, page 119.

The title for column 2 should be ' $K_D/K_I$ , nmol/l' rather than ' $K_D/K_I$ ,  $\mu\text{mol/l}$ ' and the value for  $tLAP_1$  in column 2 should be ' $3.77 \pm 1.03$ ' rather than ' $0.50 \pm 0.12$ '. The value for [ $^3\text{H}$ ]A20FMDV2 in column 3 should be ' $9.75 \pm 0.10^*$ ' rather than ' $9.77 \pm 0.08^*$ '.
